# Supplementary material for: Aptamers Evolved from Cultured Cancer Cells Reveal Molecular Differences of Cancer Cells in Patient Samples
Source: Oxford University Press journal article supplement (doi:10.1373/clinchem.2006.083246), 2007-04-26
Supplement: clinchem.2006.083246-1.doc [file clinchem.2006.083246-1.doc]

**Aptamers evolved from cancer cells reveal molecular differences of cancer patient samples**

Dihua Shangguan, Charles Cao, Ying Li and Weihong Tan*

**Departments of Chemistry, Department of Pathology and Shands Cancer Center**

**University Of Florida**

**Gainesville, Florida 32611-7200**

**352-846-2410 (phone and fax)**

**e-mail: tan@chem.ufl.edu**

**Supporting materials: methods and materials**

**Cell lines.** CCRF-CEM (CCL-119, T-cell lines, human acute lymphoblastic leukemia)，Ramos, (CRL-1596, B-cell line, human Burkitt's lymphoma), Toledo (CRL-2631**,** B-cell line, humandiffuse large cell lymphoma), Kasumi-1 (CRL-2724, acute myeloblastic leukemia), Jurkat (TIB-152, human acute T cell leukemia), Molt-4 (CRL-1582, T-cell lines, human acute lymphoblastic leukemia), Sup-T1(CRL-1942, T-cell lines, human lymphoblastic leukemia), U266 (TIB-196, B-lymphocyte, human myeloma, plasmacytoma), and SUP-B15 (CRL-1929, B-lymphoblast, human acute lymphoblastic leukemia) were obtained from ATCC. Mo2058 (Mantle-cell lymphoma, Epstein-Barr Virus-positive cell line) and NB-4 (acute promyelocytic leukemia) were obtained from the Department of Pathology, University of Florida). All the cell lines were cultured in RPMI 1640 medium (ATCC) supplemented with 10% fetal bovine serum (BSA) (heat inactivated, GIBCO) and 100 IU/mL penicillin-Streptomycin (Cellgro).

**Treatment of patient samples.** Fresh human lymphoid tissues, bone marrow and peripheral blood samples were from the Hematopathology service, the Department of Pathology, University of Florida. Tissue cell suspensions were prepared by mincing the tissue with scalpels in RPMI media, and filtering through a wire mesh screen (#80 mesh). Erythrocytes in the peripheral blood and bone marrow cell suspensions were lysed with ammonium chloride lysing solution (BD Biosciences) for 10 min at room temperature at a volume ratio of 1:9 (sample:lysing) solution. After incubation, cells were pelleted by centrifugation (500g for 5 min at room temperature). The cells were washed twice in a PBS solution containing 0.1% NaN3, and then resuspended in RPMI medium with 10% FCS and antibiotics. These cells were incubated with aptamers and analyzed by flow cytometry as described above.

**Flow cytometry profiling of cells.** FITC-labeled aptamers were mixed with PE or PerCP labeled antibodies of CD2, CD3, CD4, CD5, CD7, CD10, CD19, and CD45 respectively, and incubated with 5105 cultured cells and 5105 cells in patient samples in 200L binding buffer (Dulbecco’s phosphate buffered saline with calcium chloride, magnesium chloride, 4.5g/L glucose, yeast tRNA (0.1 mg/mL) and BSA (1 mg/mL)) for 50 min. Cells were washed twice with 0.7 ml of binding buffer (with 0.1% NaN3), and suspended in 0.4 ml of binding buffer (with 0.1% NaN3). The fluorescence was determined with a FACScan cytometer (Becton Dickinson Immunocytometry systems, San Jose, CA) by counting 30000 or 100000 events. The FITC-labeled unselected ssDNA library was used as negative control. A threshold gate based on fluorescence intensity of FITC was set such that 99 percent of negative control cells were below it. The results were expressed as the percentage of cells stained by aptamers with FITC fluorescence above the threshold.

Supplemental Data Table 1 **Aptamer profiling of cancer cells.**

| Cells lines | | sgc8 | sgc3 | sgc4 | sgd2 | sgd3 | sgd5 |
| --- | --- | --- | --- | --- | --- | --- | --- |
| Cultured cell lines | | | | | | | |
| T- ALL | CCRF-CEM | +++ | ++ | ++++ | ++++ | ++ | 0 |
| Molt-4 | ++++ | +++ | ++++ | ++++ | ++++ | 0 |
| Sup-T1 | ++++ | + | ++++ | ++++ | ++ | 0 |
| Jurkat | ++++ | +++ | ++++ | ++++ | ++++ | 0 |
| B-ALL | SUP-B15 | + | 0 | ++ | + | 0 | 0 |
| myeloma | U266, | 0 | 0 | 0 | 0 | 0 | 0 |
| B-cell lymphoma | Ramos | 0 | 0 | ++++ | ++++ | 0 | 0 |
| Toledo | 0 | 0 | ++++ | ++++ | + | ++ |
| UF1C | 0 | 0 | + | 0 | 0 | 0 |
| Mo2058 | 0 | ++ | ++ | 0 | + | 0 |
| AML | NB-4 (APL) | + | 0 | ++++ | ++++ | 0 | 0 |
| Kasumi-1 | +++ | 0 | ++++ | ++++ | ++ | 0 |
| Cells in normal bone marrow | | | | | | | |
| CD3 (+) T cells | | 0 | 0 | 0 | 0 | 0 | 0 |
| mature B cellsa | | 0 | 0 | 0 | 0 | 0 | 0 |
| Immature B cellsb | | 0 | 0 | + | + | 0 | 0 |
| Granulocytes | | 0 | 0 | 0 | 0 | 0 | 0 |
| Monocytes | | 0 | 0 | + | + | 0 | 0 |
| Erythrocytes | | 0 | 0 | ++ | ++ | 0 | 0 |
| Patient’s samples | | | | | | | |
| T ALL 1 | | ++ | +++ | +++ | +++ | +++ | ND |
| T ALL 2 | | ++ | + | +++ | ++ | + | 0 |
| T ALL 3 | | + | + | ++++ | +++ | + | 0 |
| T ALL 4 | | + | + | ++ | +++ | + | 0 |
| T ALL 5 | | + | + | ++ | + | + | 0 |
| T ALL 6 | | 0 | 0 | + | + | 0 | 0 |
| T ALL 7 | | 0 | 0 | ++ | ++ | 0 | 0 |
| TALL 8 | | + | + | ++ | ++ | + | 0 |
| TALL 9 | | + | 0 | + | + | 0 | 0 |
| TALL10 | | 0 | + | + | 0 | + | 0 |
| B ALL 1 | | 0 | 0 | ++ | ++ | 0 | 0 |
| B ALL 2 | | 0 | 0 | ++ | ++ | 0 | + |
| B ALL 3 | | ++ | 0 | ++ | ++ | 0 | + |
| B-ALL 4 | | 0 | 0 | + | + | 0 | 0 |
| AML 1 | | + | + | ++ | + | 0 | 0 |
| AML 2 | | + | 0 | ++ | + | 0 | 0 |
| AML 3 | | + | 0 | + | + | 0 | 0 |
| AML 4 | | 0 | 0 | ++++ | ++++ | 0 | 0 |
| AML 5 | | 0 | 0 | + | 0 | 0 | 0 |
| AML 6 | | + | 0 | 0 | 0 | 0 | 0 |
| AML 7 | | + | 0 | 0 | 0 | 0 | 0 |
| AML 8 | | + | 0 | +++ | +++ | 0 | 0 |
| 1, Peripheral T-cell lymphoma | | 0 | 0 | 0 | ND | ND | ND |
| 2, follicular lymphoma | | 0 | 0 | 0 | 0 | 0 | 0 |
| 3, B-cell lymphoma | | 0 | 0 | 0 | 0 | 0 | 0 |
| 4, T-cell lymphoma, | | 0 | 0 | 0 | 0 | 0 | 0 |
| 5, B cell lymphoma | | 0 | 0 | 0 | 0 | 0 | 0 |
| 6, plasma cell neoplasm | | 0 | 0 | + | + | 0 | 0 |
| 7, follicular lymphoma | | 0 | 0 | + | 0 | 0 | 0 |


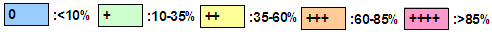


a : Mature B-Cell, CD19(+), CD10(-); b: immature B-Cell, CD19(+), CD10(+); C: UF1: Follicular large B cell lymphoma. In the flow cytometry analysis, a threshold based on fluorescence intensity of FITC was chosen so that 99 percent of cells incubated with the FITC-labeled unselected DNA library would have fluorescence intensity below it. When FITC-labeled aptamer was allowed to interact with the cells, the percentage of the cells with fluorescence above the set threshold was used to evaluate the binding capacity of the aptamer to the cells.
